# Supplementary material
Source: Springer Nature journal article supplement (https://www.springermedizin.de/resource/supplementary/12889_2013_6876_MOESM2_ESM.pdf/9499144)

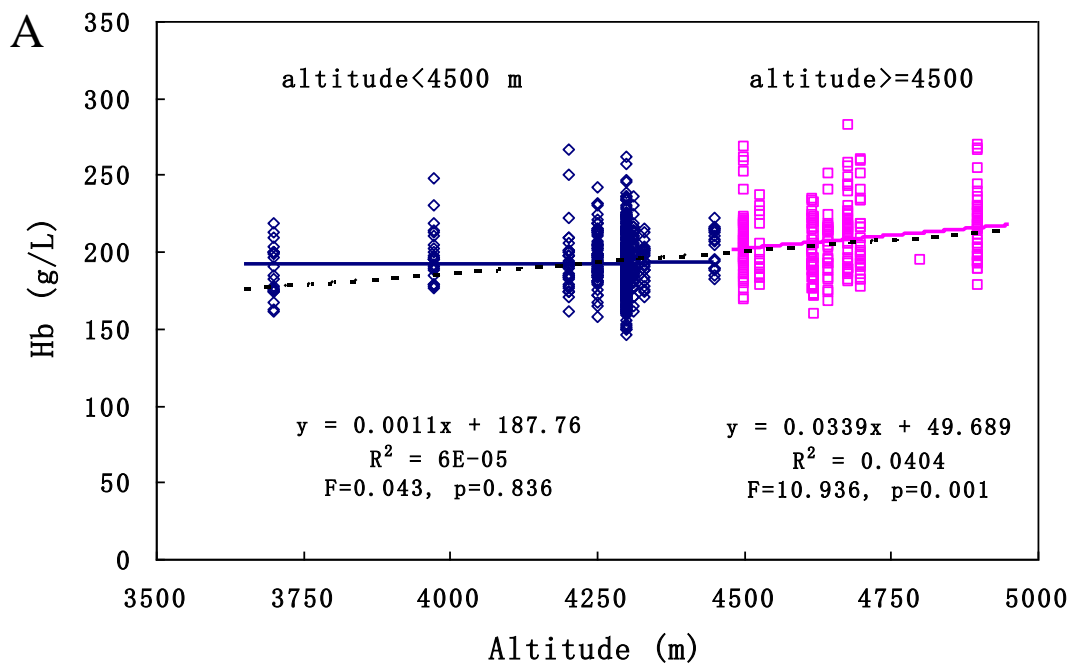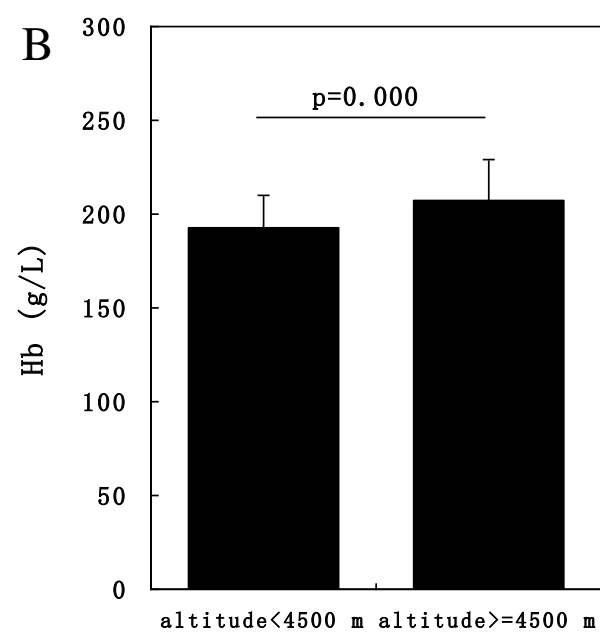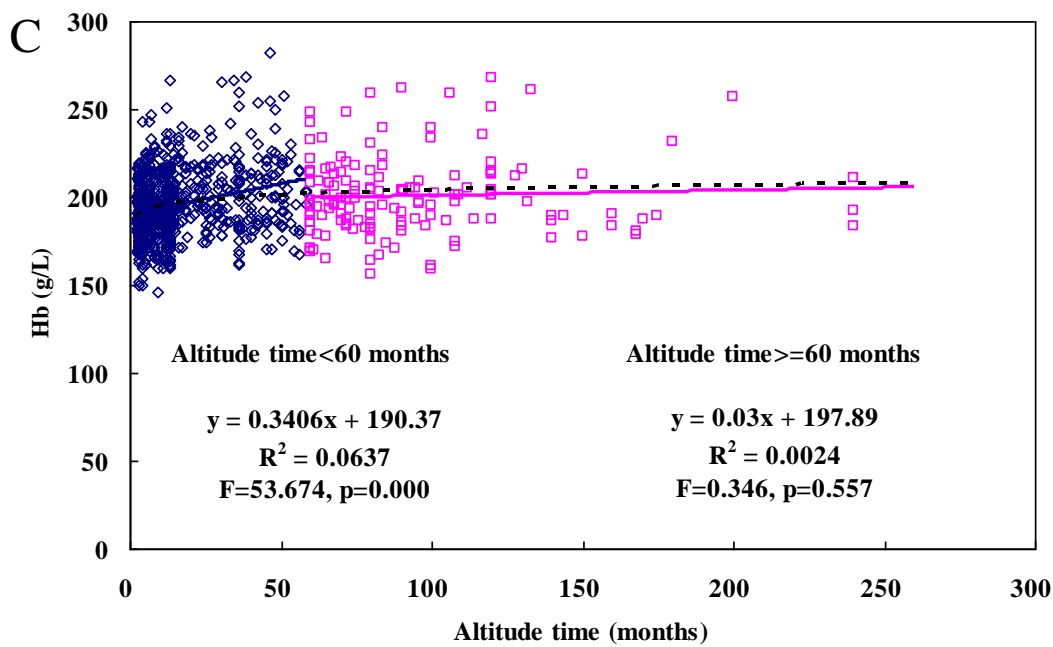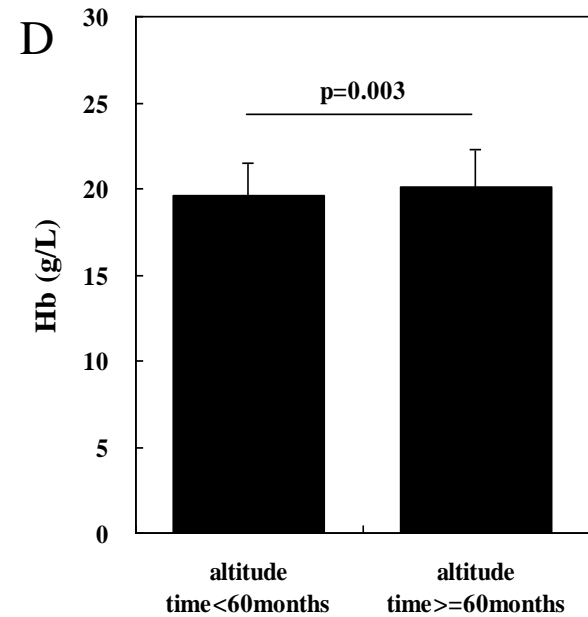

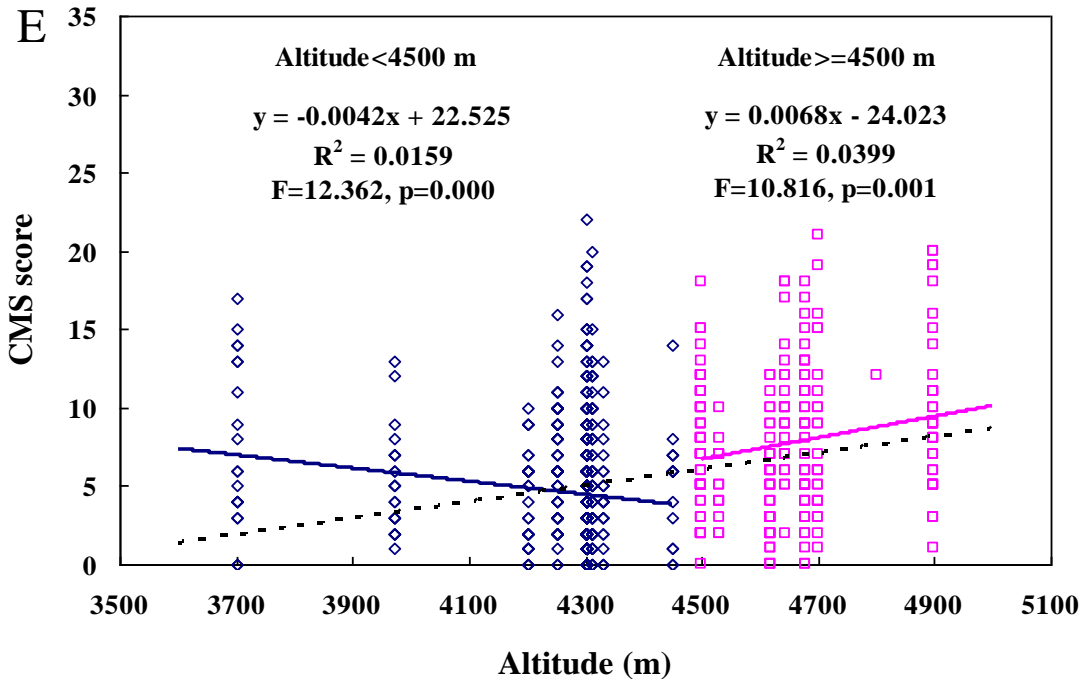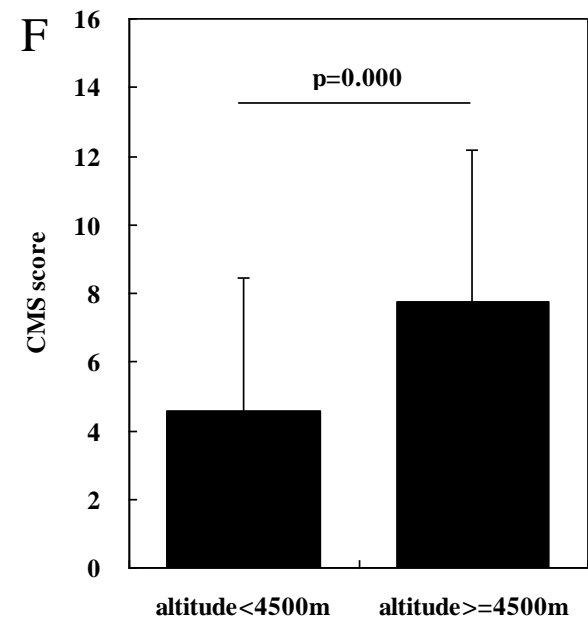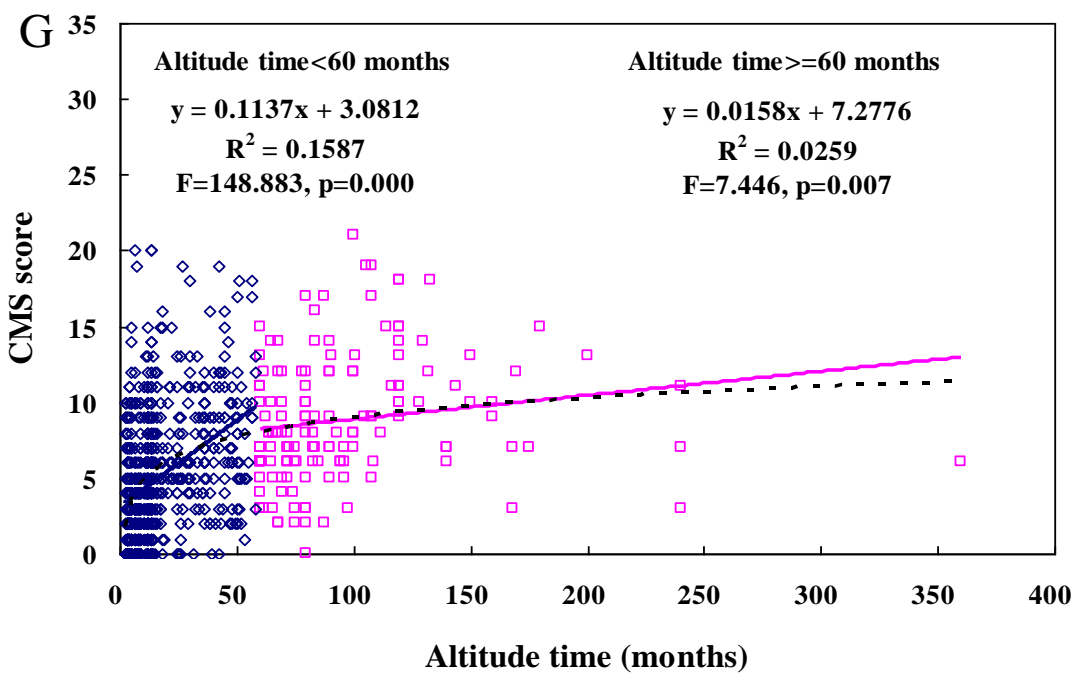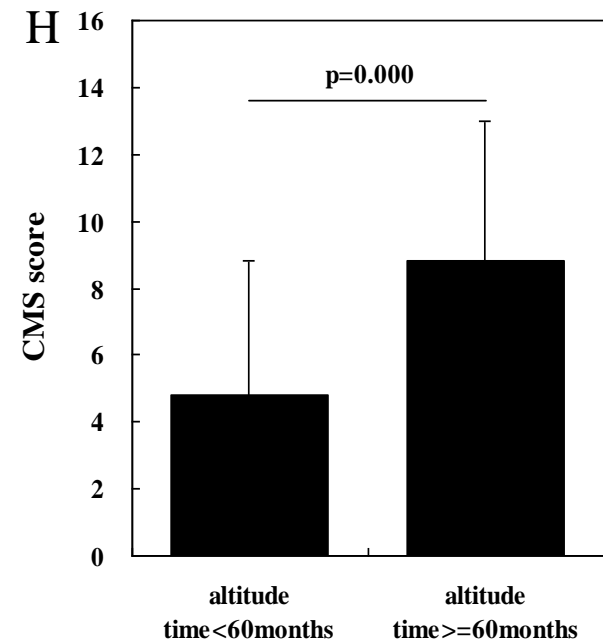

Supplement: MOESM2 [file 9499144]
